# Supplementary material for: Olive oil tyrosols reduce α-synuclein aggregation in vitro and in vivo after ingestion in a Caenorhabditis elegans Parkinson's model
Source: Royal Society of Chemistry journal article supplement (doi:10.1039/d4fo01663g), 2024-01-01
Supplement: d4fo01663g1.pdf [file d4fo01663g1.pdf]

**Olive oil tyrosols reduce  $\alpha$ -synuclein aggregation *in vitro* and *in vivo* after ingestion in a *Caenorhabditis elegans* Parkinson model.**

Samanta Hernández-García<sup>a,#</sup>, Beatriz Cano García<sup>a,#</sup>, Pedro Martínez-Rodríguez<sup>a</sup>, Paula Henarejos-Escudero<sup>a</sup>, Fernando Gandía-Herrero<sup>a\*</sup>

<sup>a</sup>Departamento de Bioquímica y Biología Molecular A, Unidad Docente de Biología, Facultad de Veterinaria. Regional Campus of International Excellence "Campus Mare Nostrum". Universidad de Murcia, Murcia (Spain).

\*Corresponding author (Tel: +34 868 889592; Fax: +34 868 884147; E-mail: fgandia@um.es)

#Co-first authors

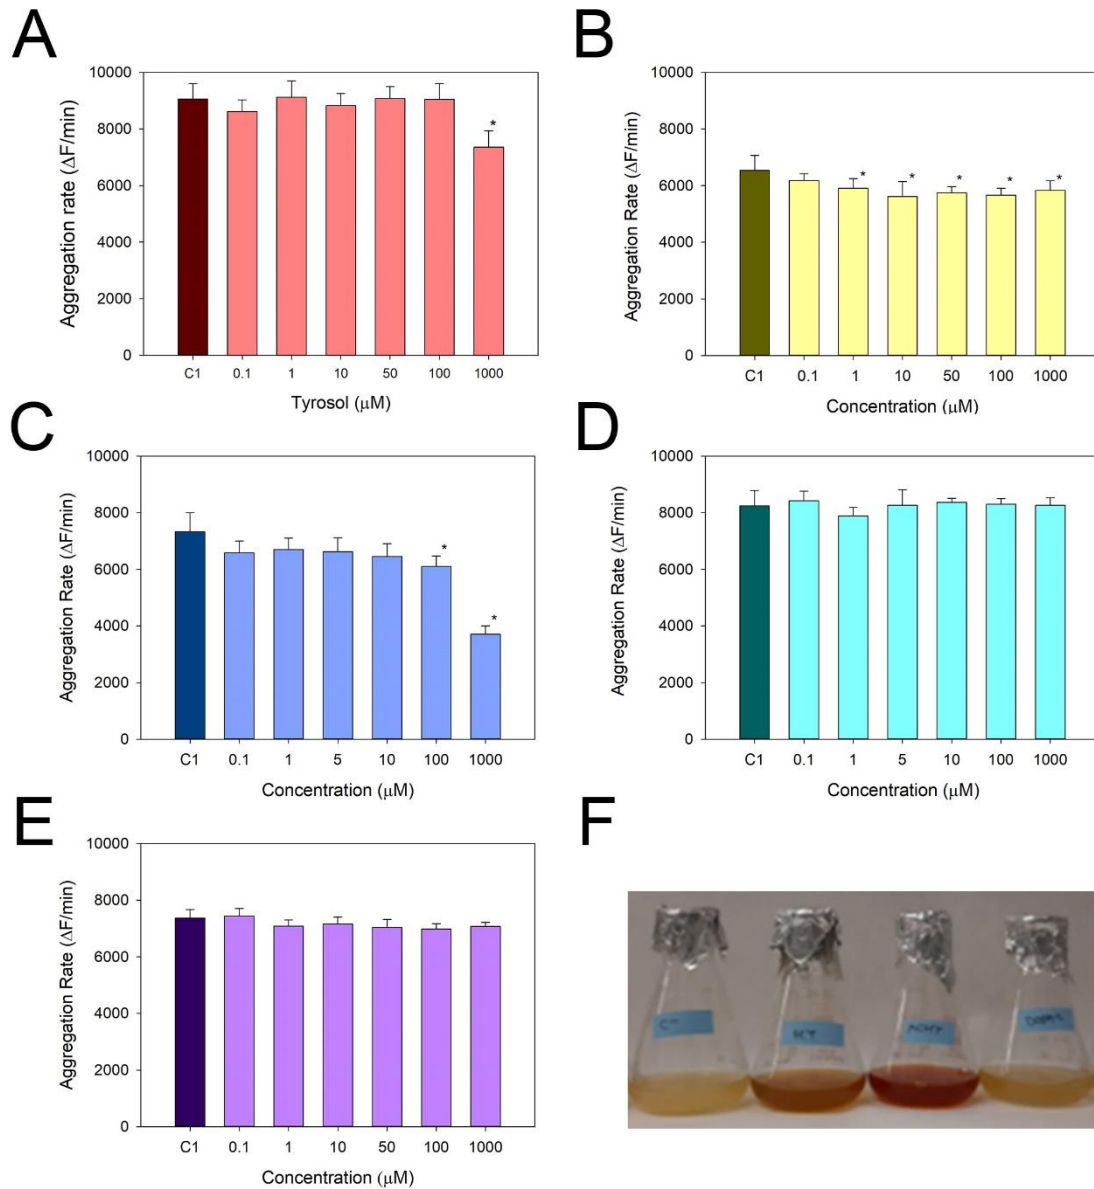

**Fig. S1: Effect of bioactive molecules, on  $\alpha$ S aggregation rate.** (A-E) Compounds dose dependence assay for the molecules: (A) tyrosol, (B) hydroxytyrosol acetate, (C) hydroxytyrosol, (D) DOPAC, and (E) dopamine. (F) Imagen showing the compounds oxidation. Data are represented as mean  $\pm$  standard deviation of 5 replicates per condition, \* p-value  $\leq 0.05$  by ANOVA test using Bonferroni *post hoc* test. C1 is the control.

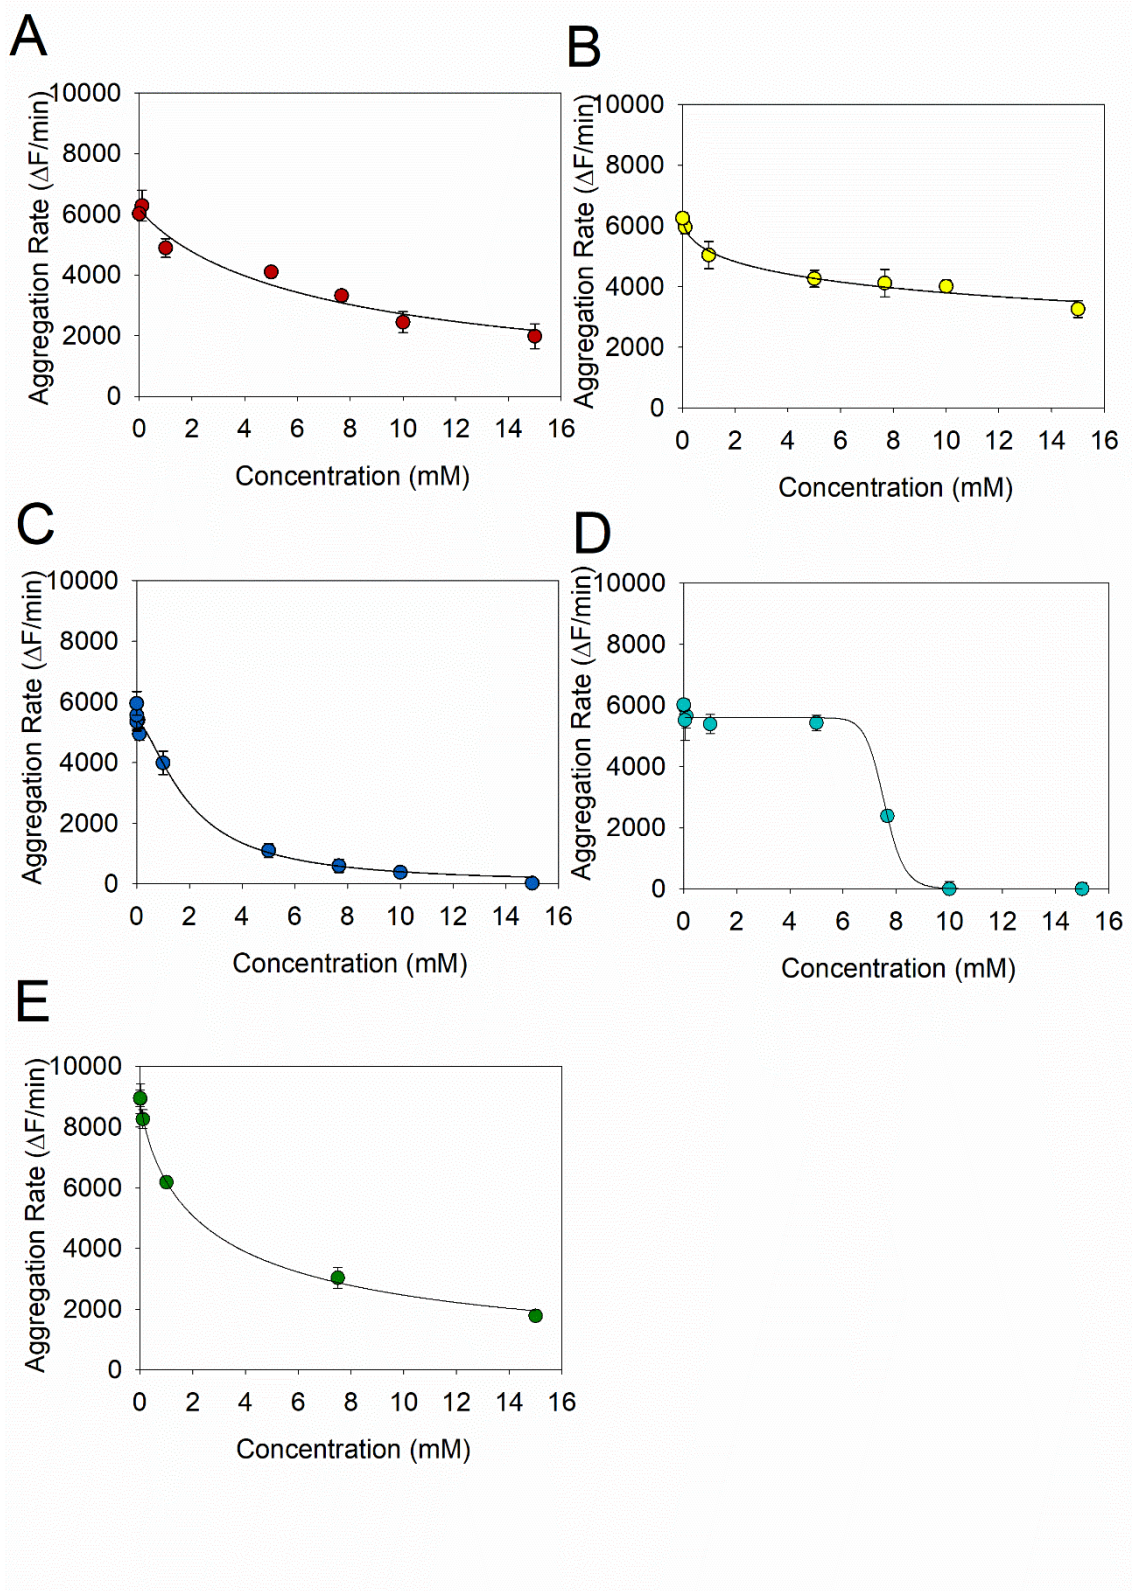

**Fig. S2: Bioactive molecules IC<sub>50</sub> curves.** (A) Tyrosol. (B) Hydroxytyrosol acetate. (C) Hydroxytyrosol. (D) DOPAC. (E) Sodium ascorbate.

**Table S1. Summary data from the *in vitro* aggregation assay without sodium ascorbate.**

| Compounds              | C ( $\mu$ M)    | $\Delta F \text{ min}^{-1}$ <sup>a</sup> | S.D.   | Reduction (%) <sup>b</sup> | <i>p</i> value <sup>c</sup> |
|------------------------|-----------------|------------------------------------------|--------|----------------------------|-----------------------------|
| Tyrosol                | 1000            | 7358.10                                  | 575.44 | 18.78                      | <0.001                      |
|                        | 100             | 9050.00                                  | 552.14 | 0.11                       | 0.609                       |
|                        | 50              | 9077.14                                  | 419.26 | -0.19                      | 0.922                       |
|                        | 10              | 8830.48                                  | 426.87 | 2.53                       | 0.996                       |
|                        | 1               | 9125.24                                  | 575.44 | -0.73                      | 0.998                       |
|                        | 0.1             | 8619.54                                  | 407.39 | 4.86                       | 0.976                       |
|                        | C1 <sup>d</sup> | 9059.54                                  | 542.75 |                            |                             |
| Hydroxytyrosol         | 1000            | 5832.00                                  | 344.86 | 10.87                      | 0.015                       |
|                        | 100             | 5663.00                                  | 243.77 | 13.45                      | 0.004                       |
|                        | 50              | 5746.00                                  | 222.26 | 12.18                      | 0.008                       |
|                        | 10              | 5619.00                                  | 527.87 | 14.12                      | 0.003                       |
|                        | 1               | 5907.00                                  | 342.77 | 9.72                       | 0.022                       |
|                        | 0.1             | 6185.00                                  | 232.66 | 5.47                       | 0.137                       |
|                        | C1 <sup>d</sup> | 6543.00                                  | 528.78 |                            |                             |
| Hydroxytyrosol acetate | 1000            | 3706.28                                  | 293.45 | 49.43                      | <0.001                      |
|                        | 100             | 6102.24                                  | 368.62 | 16.73                      | 0.004                       |
|                        | 10              | 6459.06                                  | 452.77 | 11.87                      | 0.05                        |
|                        | 5               | 6629.80                                  | 483.52 | 9.54                       | 0.081                       |
|                        | 1               | 6704.88                                  | 400.04 | 8.51                       | 0.066                       |
|                        | 0.1             | 6586.88                                  | 418.65 | 10.12                      | 0.09                        |
|                        | C1 <sup>d</sup> | 7328.66                                  | 674.86 |                            |                             |
| DOPAC                  | 1000            | 8266.68                                  | 259.43 | -0.25                      | 0.929                       |
|                        | 100             | 8299.82                                  | 198.48 | -0.66                      | 0.994                       |
|                        | 10              | 8369.12                                  | 145.97 | -1.50                      | 0.975                       |
|                        | 5               | 8267.04                                  | 548.24 | -0.26                      | 0.995                       |
|                        | 1               | 7888.00                                  | 297.75 | 4.34                       | 0.585                       |
|                        | 0.1             | 8421.72                                  | 340.49 | -2.13                      | 0.953                       |
|                        | C1 <sup>d</sup> | 8245.70                                  | 534.07 |                            |                             |
| Dopamine               | 1000            | 7077.32                                  | 145.20 | 4.01                       | 1.945                       |
|                        | 100             | 6981.32                                  | 186.94 | 5.32                       | 0.09                        |
|                        | 50              | 7038.66                                  | 280.65 | 4.54                       | 2.199                       |
|                        | 10              | 7160.02                                  | 243.91 | 2.89                       | 1.402                       |
|                        | 1               | 7085.32                                  | 214.66 | 3.91                       | 1.893                       |
|                        | 0.1             | 7441.32                                  | 272.00 | -0.92                      | 0.447                       |
|                        | C1 <sup>d</sup> | 7373.32                                  | 301.38 |                            |                             |

<sup>a</sup> Average aggregation rate measured from 5 replicates. <sup>b</sup> Aggregates formation rate reduction. <sup>c</sup> Value obtained through the ANOVA test using Bonferroni *post hoc* test, statistically significant differences are considered when  $p < 0.05$ . <sup>d</sup> Corresponds to control cells without compound.

**Table S2. Summary data from the *in vitro* aggregation assay with sodium ascorbate.**

| Compounds + 1 mM Ascorbate | C (mM)          | $\Delta F \text{ min}^{-1}$ <sup>a</sup> | S.D.   | Reduction vs C2 (%) <sup>b</sup> | <i>p</i> value <sup>c</sup> | Reduction vs C1 (%) <sup>d</sup> |
|----------------------------|-----------------|------------------------------------------|--------|----------------------------------|-----------------------------|----------------------------------|
| Tyrosol                    | 15              | 1983.98                                  | 407.01 | 67.08                            | <0.001                      | 75.21                            |
|                            | 10              | 2444.00                                  | 348.04 | 59.45                            | <0.001                      | 69.47                            |
|                            | 7.67            | 3322.64                                  | 184.24 | 44.87                            | <0.001                      | 58.49                            |
|                            | 5               | 4104.00                                  | 164.90 | 31.90                            | <0.001                      | 48.73                            |
|                            | 1               | 4893.32                                  | 308.08 | 18.81                            | 0.036                       | 38.87                            |
|                            | 0.1             | 6286.66                                  | 508.35 | -4.31                            | 0.423                       | 21.46                            |
|                            | 0.05            | 5849.34                                  | 375.63 | 2.94                             | 0.97                        | 26.92                            |
|                            | 0.01            | 5956.00                                  | 361.99 | 1.17                             | 0.92                        | 1.23                             |
|                            | 0.001           | 6190.68                                  | 282.99 | -2.72                            | 0.559                       | 22.66                            |
|                            | 0.0001          | 5721.34                                  | 568.67 | 5.07                             | 0.84                        | 28.52                            |
|                            | C2 <sup>e</sup> | 6026.66                                  | 177.79 |                                  |                             |                                  |
| C1 <sup>f</sup>            | 8004.43         | 480.49                                   |        |                                  |                             |                                  |
| Hydroxytyrosol             | 15              | 3261.32                                  | 275.52 | 47.87                            | <0.001                      | 63.57                            |
|                            | 10              | 4008.00                                  | 203.32 | 35.94                            | <0.001                      | 55.23                            |
|                            | 7.67            | 4114.66                                  | 458.19 | 34.24                            | <0.001                      | 54.04                            |
|                            | 5               | 4261.34                                  | 276.67 | 31.89                            | 0.002                       | 52.40                            |
|                            | 1               | 5040.00                                  | 448.55 | 19.45                            | 0.045                       | 43.70                            |
|                            | 0.1             | 5958.35                                  | 219.28 | 4.77                             | 0.878                       | 33.44                            |
|                            | 0.05            | 5741.68                                  | 348.27 | 8.23                             | 0.688                       | 35.86                            |
|                            | 0.01            | 6530.00                                  | 546.62 | -4.37                            | 0.788                       | 27.06                            |
|                            | 0.001           | 7371.68                                  | 705.55 | -17.82                           | 0.415                       | 17.65                            |
|                            | 0.0001          | 6468.35                                  | 372.26 | -3.38                            | 0.634                       | 27.74                            |
|                            | C2 <sup>e</sup> | 6256.65                                  | 197.18 |                                  |                             |                                  |
| C1 <sup>f</sup>            | 8952.00         | 271.10                                   |        |                                  |                             |                                  |
| Hydroxytyrosol acetate     | 15              | 24.00                                    | 102.47 | 99.60                            | <0.001                      | 99.73                            |
|                            | 10              | 381.33                                   | 64.69  | 93.59                            | <0.001                      | 95.70                            |
|                            | 7.67            | 596.00                                   | 220.17 | 89.99                            | <0.001                      | 93.28                            |
|                            | 5               | 1098.66                                  | 233.14 | 81.55                            | <0.001                      | 87.61                            |
|                            | 1               | 3993.34                                  | 383.13 | 32.92                            | <0.001                      | 54.98                            |
|                            | 0.1             | 4949.34                                  | 216.24 | 16.86                            | 0.002                       | 44.21                            |
|                            | 0.05            | 5402.66                                  | 289.64 | 9.25                             | 0.096                       | 39.10                            |
|                            | 0.01            | 5528.00                                  | 123.68 | 7.14                             | 0.179                       | 37.68                            |
|                            | 0.001           | 5356.00                                  | 306.46 | 10.03                            | 0.084                       | 39.62                            |
|                            | 0.0001          | 5565.34                                  | 460.86 | 6.52                             | 0.125                       | 37.26                            |
|                            | C2 <sup>e</sup> | 5953.33                                  | 390.66 |                                  |                             |                                  |
| C1 <sup>f</sup>            | 8870.68         | 286.18                                   |        |                                  |                             |                                  |
| DOPAC                      | 15              | 0.00                                     | 204.18 | 100.00                           | <0.001                      | 100.00                           |
|                            | 10              | 0.00                                     | 242.18 | 100.00                           | <0.001                      | 100.00                           |
|                            | 7.67            | 2385.34                                  | 180.23 | 60.42                            | <0.001                      | 70.20                            |

|                 |                 |         |        |        |        |       |
|-----------------|-----------------|---------|--------|--------|--------|-------|
|                 | 5               | 5433.35 | 254.16 | 9.84   | 0.012  | 32.12 |
|                 | 1               | 5394.66 | 310.22 | 10.49  | 1.381  | 32.60 |
|                 | 0.1             | 5661.34 | 396.13 | 6.06   | 0.432  |       |
|                 | 0.05            | 5522.20 | 666.84 | 8.37   | 0.803  | 31.01 |
|                 | 0.01            | 6004.02 | 204.81 | 0.38   | 0.788  | 24.99 |
|                 | 0.001           | 6057.34 | 399.45 | -0.51  | 0.978  | 24.33 |
|                 | 0.0001          | 6735.98 | 268.93 | -11.77 | 0.013  | 15.85 |
|                 | C2 <sup>e</sup> | 6026.66 | 177.79 |        |        |       |
|                 | C1 <sup>f</sup> | 8004.43 | 480.49 |        |        |       |
| Dopamine        | 15              | 4010.66 | 304.18 | 28.70  | <0.001 | 44.45 |
|                 | 10              | 3950.64 | 171.67 | 29.77  | <0.001 | 45.28 |
|                 | 7.67            | 3900.00 | 238.39 | 30.67  | <0.001 | 45.98 |
|                 | 5               | 4124.00 | 300.27 | 26.69  | <0.001 | 42.88 |
|                 | 1               | 5894.66 | 239.62 | -4.79  | 0.763  | 18.36 |
|                 | 0.1             | 5701.34 | 314.23 | -1.35  | 0.853  | 21.03 |
|                 | 0.05            | 6042.64 | 871.12 | -7.42  | 0.676  | 16.31 |
|                 | 0.01            | 6614.66 | 879.61 | -17.59 | 0.122  | 8.38  |
|                 | 0.001           | 4877.34 | 723.65 | 13.30  | 0.327  | 32.45 |
|                 | 0.0001          | 6068.00 | 243.37 | -7.87  | 0.739  | 15.96 |
|                 | C2 <sup>e</sup> | 5625.34 | 197.50 |        |        |       |
| C1 <sup>f</sup> | 7220.02         | 264.12  |        |        |        |       |
| L-Dopa          | 1.14            | 4317.34 | 227.31 | 23.25  | <0.001 | 40.20 |
|                 | 0.761           | 4212.00 | 334.45 | 25.12  | <0.001 | 41.66 |
|                 | 0.58            | 4229.34 | 392.78 | 24.82  | <0.001 | 41.42 |
|                 | 0.38            | 4393.33 | 349.95 | 21.90  | <0.001 | 39.15 |
|                 | C2 <sup>e</sup> | 5625.34 | 197.50 |        |        |       |
|                 | C1 <sup>f</sup> | 7220.02 | 264.12 |        |        |       |
| Ascorbate       | 15              | 1777.32 | 174.90 | 80.15  | <0.001 |       |
|                 | 7.5             | 3029.34 | 344.32 | 66.16  | <0,001 |       |
|                 | 1               | 6180.66 | 178.79 | 30.96  | <0,001 |       |
|                 | 0.1             | 8261.68 | 305.42 | 7.71   | 0.021  |       |
|                 | 0.01            | 8935.00 | 487.91 | 0.19   | 0.946  |       |
|                 | C1 <sup>f</sup> | 8952.00 | 271.10 |        |        |       |

<sup>a</sup> Average aggregation rate measured from 5 replicates. <sup>b</sup> Aggregates formation rate reduction vs C2. <sup>c</sup> Value obtained through the ANOVA test using Bonferroni *post hoc* test, statistically significant differences are considered when  $p < 0.05$ . <sup>d</sup> Aggregates formation rate reduction vs C1. <sup>e</sup> C2 Corresponds to control cells with 1 mM ascorbate. <sup>f</sup> C1 Corresponds to control cells without compound.

**Table S3. Data from the IC<sub>50</sub> ajustement**

|                        | IC <sub>50</sub> (mM) | S.D. | t     | <i>p</i> -value |
|------------------------|-----------------------|------|-------|-----------------|
| Tyrosol                | 7.56                  | 0.24 | 31.68 | <0.0001         |
| Hydroxytyrosol         | 22.89                 | 6.74 | 3.40  | 0.0274          |
| Hydroxytyrosol acetate | 1.97                  | 0.17 | 11.76 | <0.0001         |
| DOPAC                  | 7.61                  | 1.85 | 4.11  | 0.0147          |
| Sodium Ascorbate       | 2.81                  | 0.25 | 11.31 | 0.0015          |

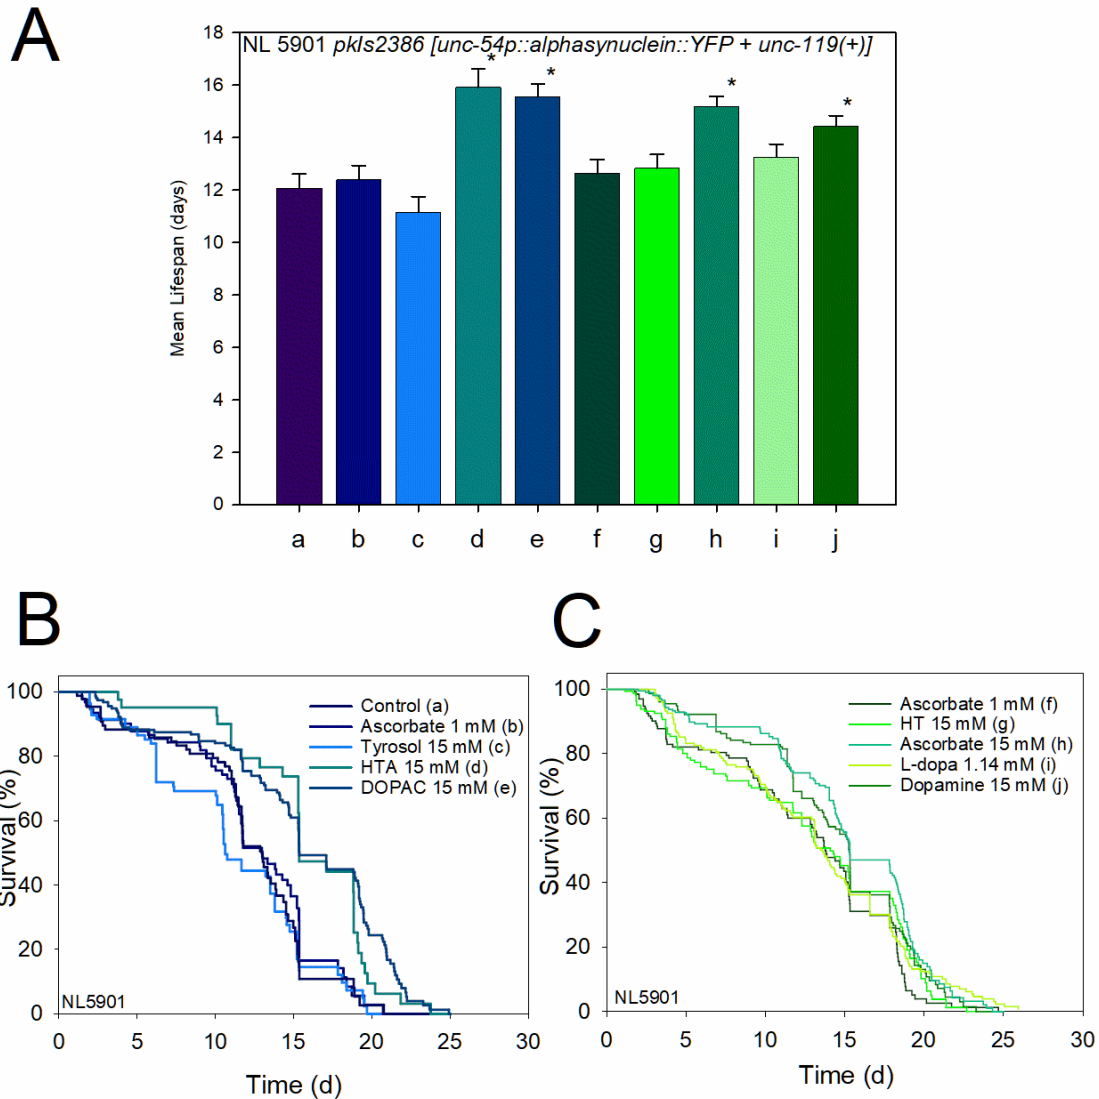

**Fig. S3. Effect of compounds on *C. elegans* strain NL5901 lifespan.** (A) Mean lifespan; **a** NL 5901 control, **b** nematodes treated with sodium ascorbate 1 mM, **c** nematodes treated with tyrosol 15 mM supplemented with sodium ascorbate 1 mM, **d** nematodes treated with HTA 15 mM supplemented with sodium ascorbate 1 mM, **e** nematodes treated with DOPAC 15 mM supplemented with sodium ascorbate 1 mM, **f** nematodes treated with sodium ascorbate 1 mM, **g** nematodes treated with hydroxytyrosol 15 mM supplemented with sodium ascorbate 1 mM, **h** nematodes treated with dopamine 15 mM supplemented with sodium ascorbate 1 mM, **i** nematodes treated with L-dopa 1,14 mM supplemented with sodium ascorbate 1 mM, **j** nematodes treated with sodium ascorbate 15 mM. Data represented as average  $\pm$  E.S, assays were performed for triplicate, \* significant at  $p$ -value  $\leq 0.05$  by F-test. (B-C) Survival curves.



**Table S4. *C. elegans* survival data**

| Treatment              | n   | Mean Lifespan (d) | S.E. | 95 ci         | Maximum Lifespan (d) | Change (%) | <i>p</i> value |
|------------------------|-----|-------------------|------|---------------|----------------------|------------|----------------|
| Control                | 89  | 12.07             | 0.54 | 11.01 ~ 13.12 | 20.68                |            |                |
| Sodium ascorbate 1 mM  | 95  | 12.39             | 0.54 | 11.33 ~ 13.45 | 20.74                | 0.00       |                |
| Tyrosol 15 mM          | 85  | 11.16             | 0.59 | 10.00 ~ 12.32 | 19.66                | -9.93      | 0.0776         |
| HTA 15 mM              | 102 | 15.92             | 0.70 | 14.55 ~ 17.30 | 23.73                | 28.49      | 0.0001         |
| DOPAC 15 mM            | 160 | 15.56             | 0.49 | 14.59 ~ 16.52 | 24.9                 | 25.59      | 6.30E-09       |
| Sodium ascorbate 1 mM  | 137 | 12.64             | 0.53 | 11.60 ~ 13.69 | 24.67                | 0.00       |                |
| Hydroxytyrosol 15 mM   | 166 | 12.83             | 0.53 | 11.80 ~ 13.87 | 22.67                | 1.50       | 0.2278         |
| Sodium ascorbate 15 mM | 114 | 15.19             | 0.39 | 14.43 ~ 15.95 | 24.3                 | 20.17      | 0.0001         |
| L-dopa 1.14 mM         | 151 | 13.25             | 0.50 | 12.27 ~ 14.23 | 21.3                 | 4.83       | 0.207          |
| Dopamine 15 mM         | 160 | 14.42             | 0.42 | 13.59 ~ 15.25 | 23.26                | 14.08      | 0.0091         |

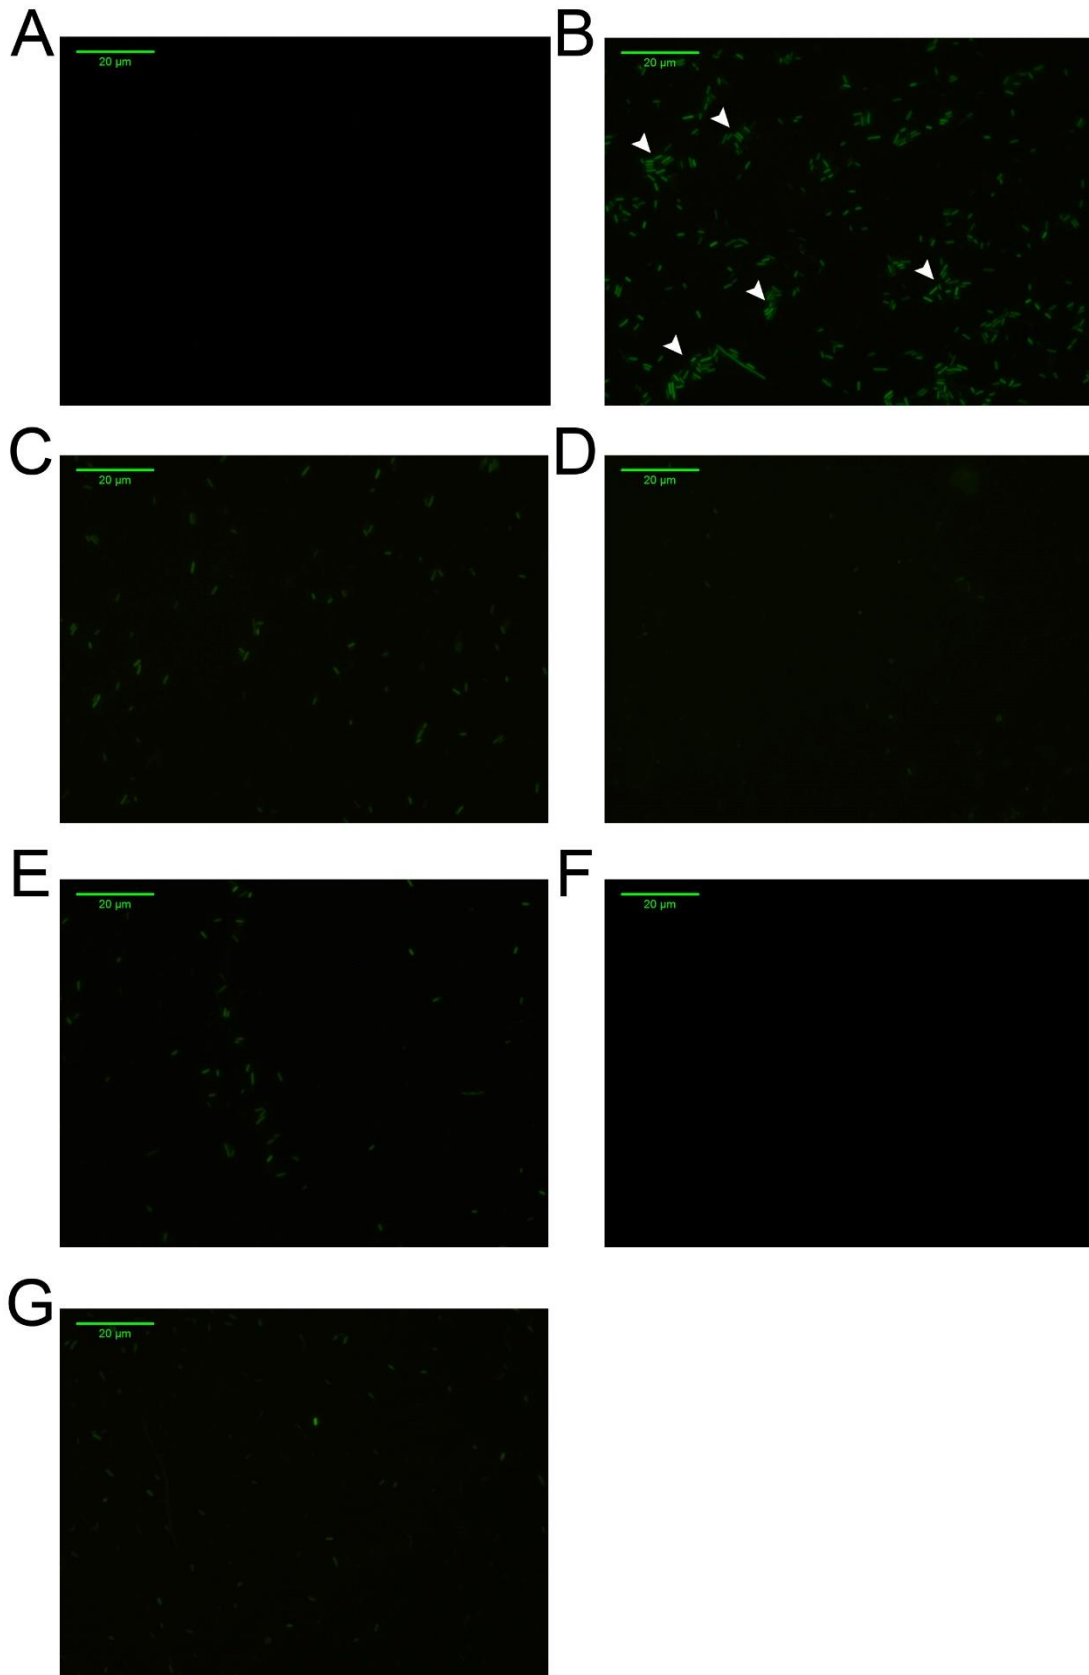

**Fig. S4. Raw images used in Figure. 3.** Microscopy of the BiFC  $\alpha$ S aggregation model. (A-G) Representative fluorescence images of the *E. coli* cells. (A) Negative control (without inducer). (B) Positive control (cells induced with IPTG). The arrowheads point

the cells. (C) Treatment with sodium ascorbate 1 mM. (D) Treatment with sodium ascorbate 15 mM. (E) DOPAC 1 mM stabilized with 1 mM sodium ascorbate. (F) DOPAC 15 mM stabilized with 1 mM sodium ascorbate. (G) Treatment with HTA 15 mM stabilized with sodium ascorbate 1 mM. Scale bar 20  $\mu\text{m}$ .

A

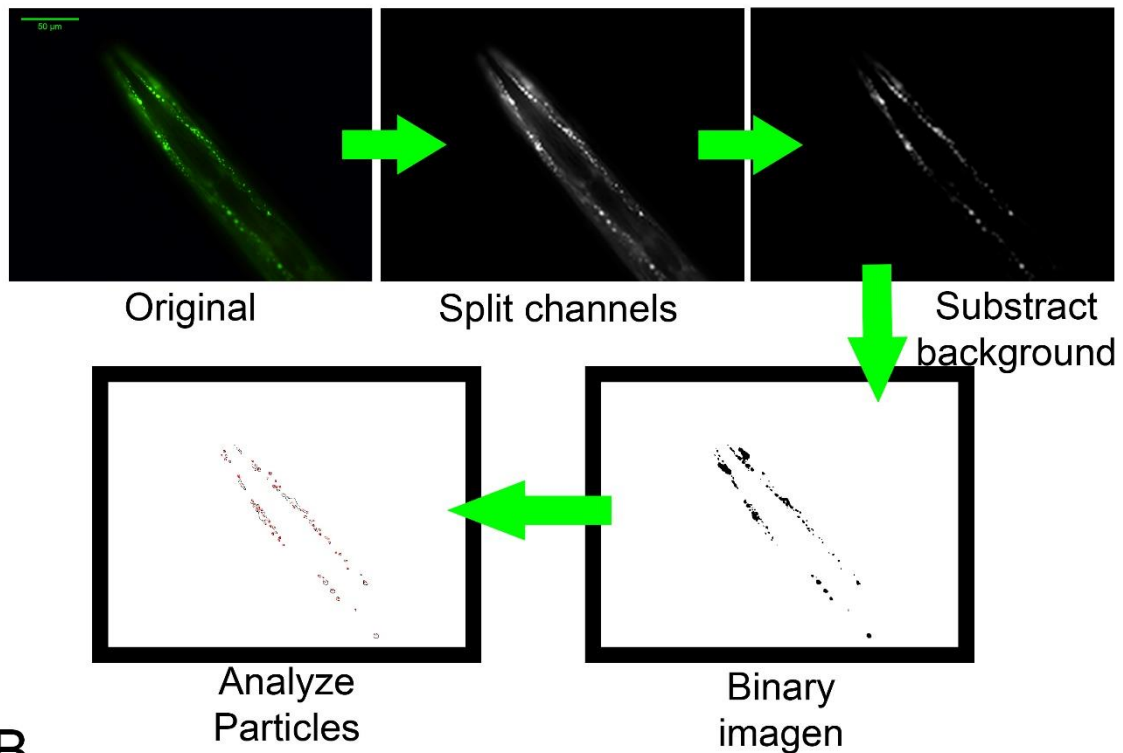

B

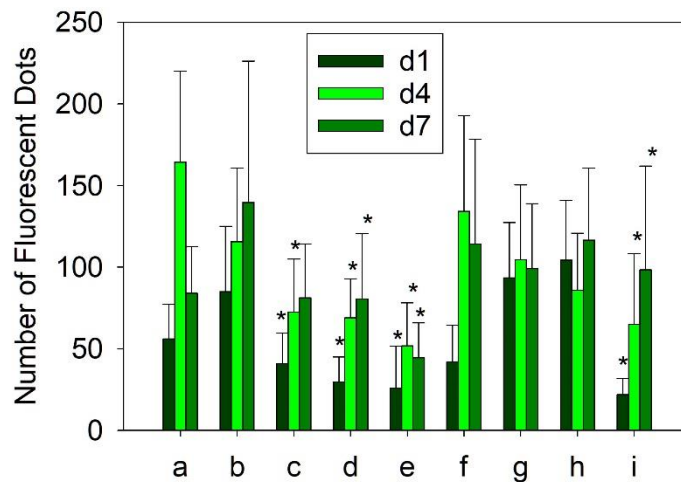

**Fig. S5.  $\alpha$ S aggregates measurements.** (A) Overview of image analysis performed to count the number of  $\alpha$ S aggregates *in vivo*. (B) Quantification of the number of  $\alpha$ S aggregates *in vivo* under different conditions. (a) Control. (b) Control with 1 mM sodium ascorbate. (c) Sodium ascorbate at 15 mM. (d) Hydroxytyrosol acetate 15 mM stabilized with sodium ascorbate. (e) DOPAC 15 mM stabilized with sodium ascorbate. (f) Hydroxytyrosol 15 mM stabilized with sodium ascorbate. (g) Tyrosol 15 mM stabilized with sodium ascorbate. (h) L-dopa 1.14 mM stabilized with sodium ascorbate. (i) Dopamine 15 mM stabilized with sodium ascorbate. Data are shown as mean  $\pm$  standard deviation, \* significant at p-value  $\leq 0.05$  by ANOVA test using Bonferroni *post hoc* test. Two independent experiments were performed and minimum 20 individuals were analyzed.
